# Supplementary material for: Effects of Nocturnal Aircraft Noise and Non-Acoustical Factors on Short-Term Annoyance in Primary School Children
Source: MDPI journal article supplement (doi:10.3390/ijerph18136959), 2021-06-29
Supplement: s1 [file s1]

**Supplementary Table S1.** Univariate logistic regression analyses with random effects of several acoustical predictors for aircraft noise-induced short-term annoyance at night in children. Odds Ratios (OR) with 95 % Confidence Intervals (CI) and p-values. (N = 134 nights, 48 subjects).

|                     | OR    | CI            | <i>p</i> -Value |
|---------------------|-------|---------------|-----------------|
| $N_{AC}$            | 0.999 | 0.983-1.015   | .897            |
| $NAT_{30}$          | 0.998 | 0.982-1.014   | .766            |
| $NAT_{35}$          | 0.997 | 0.981-1.014   | .754            |
| $NAT_{40}$          | 1.000 | 0.982-1.017   | .966            |
| $NAT_{45}$          | 0.997 | 0.977-1.017   | .756            |
| $NAT_{50}$          | 0.998 | 0.971-1.026   | .880            |
| $NAT_{55}$          | 0.994 | 0.947-1.043   | .792            |
| $L_1$               | 1.000 | 0.940-1.064   | .992            |
| $L_{10}$            | 0.984 | 0.882-1.098   | .770            |
| max $L_{Amax,AC}$   | 1.000 | 0.945-1.057   | .987            |
| mean $L_{Amax,AC}$  | 1.004 | 0.939-1.073   | .910            |
| $L_{Aeq,AC}$        | 0.998 | 0.907-1.097   | .960            |
| $SNR$               | 1.314 | 0.013-135.317 | .907            |
| Total AC time [sec] | 1.000 | 1.000-1.000   | .603            |

Note. The effect of  $NAT_{60}$  to  $NAT_{75}$  is not reported because of a too low number of valid data ( $n \leq 22$ ).
